# Supplementary material for: Pentacoordinated pyramidal structures and bonding properties of WN10−/0: anion photoelectron spectroscopy and theoretical calculations
Source: Royal Society of Chemistry journal article supplement (doi:10.1039/d4cp02262a), 2024-01-01
Supplement: d4cp02262a1.pdf [file d4cp02262a1.pdf]

## *Supplementary Materials*

### **Pentacoordinated pyramidal structures and bonding properties of $\text{WN}_{10}^{-/0}$ : anion photoelectron spectroscopy and theoretical calculations**

Kai-Wen Liu,<sup>ab</sup> Jia-Le Li,<sup>cd</sup> Xi-Ling Xu,<sup>ab</sup> Hong-Guang Xu,<sup>\*ab</sup> Ke-Wei Ding<sup>\*cd</sup> and Wei-Jun Zheng<sup>\*ab</sup>

<sup>a</sup> Beijing National Laboratory for Molecular Sciences (BNLMS), State Key Laboratory of Molecular Reaction Dynamics, Institute of Chemistry, Chinese Academy of Sciences, Beijing 100190, China

<sup>b</sup> University of Chinese Academy of Sciences, Beijing 100049, China

<sup>c</sup> State Key Laboratory of Fluorine & Nitrogen Chemicals, Xi'an 710065, China

<sup>d</sup> Xi'an Modern Chemistry Research Institute, Xi'an 710065, China

\* Corresponding author. E-mail: xuhong@iccas.ac.cn, dkw204@163.com, zhengwj@iccas.ac.cn

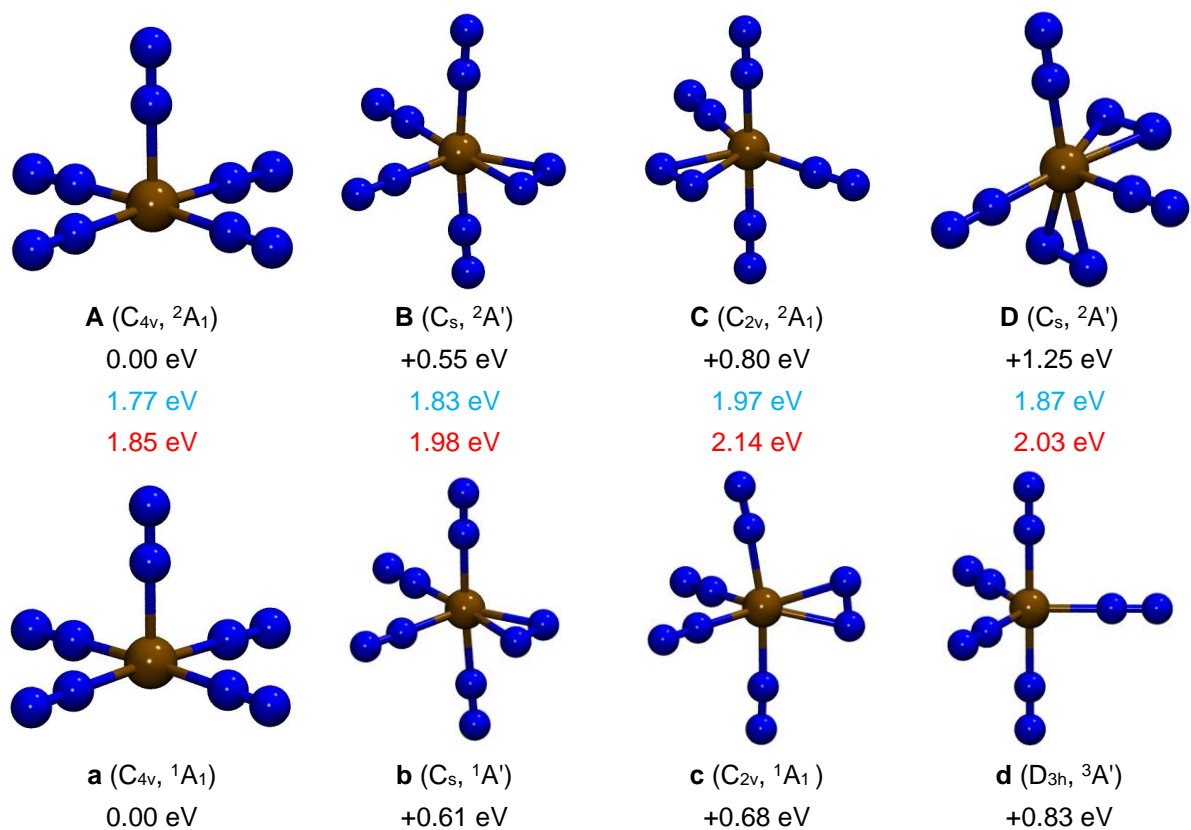

**Fig. S1** Typical low-lying isomers of  $WN_{10}^{-0}$  clusters optimized at the B3LYP-D3BJ/ma-TZVP. The relative energies were calculated at the same level. The brown/blue balls stand for W/N, respectively. The value in blue/red value stand ADE/VDE of corresponding cluster.

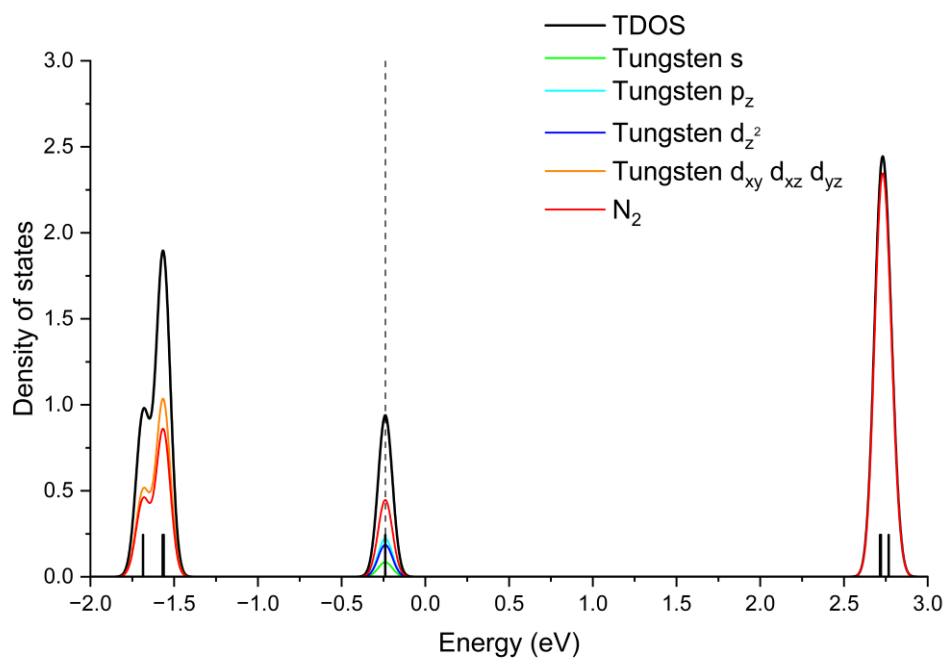

**Fig. S2** DOS map of the  $\text{WN}_{10}^-$ . The dashed line represents the location of the HOMO.

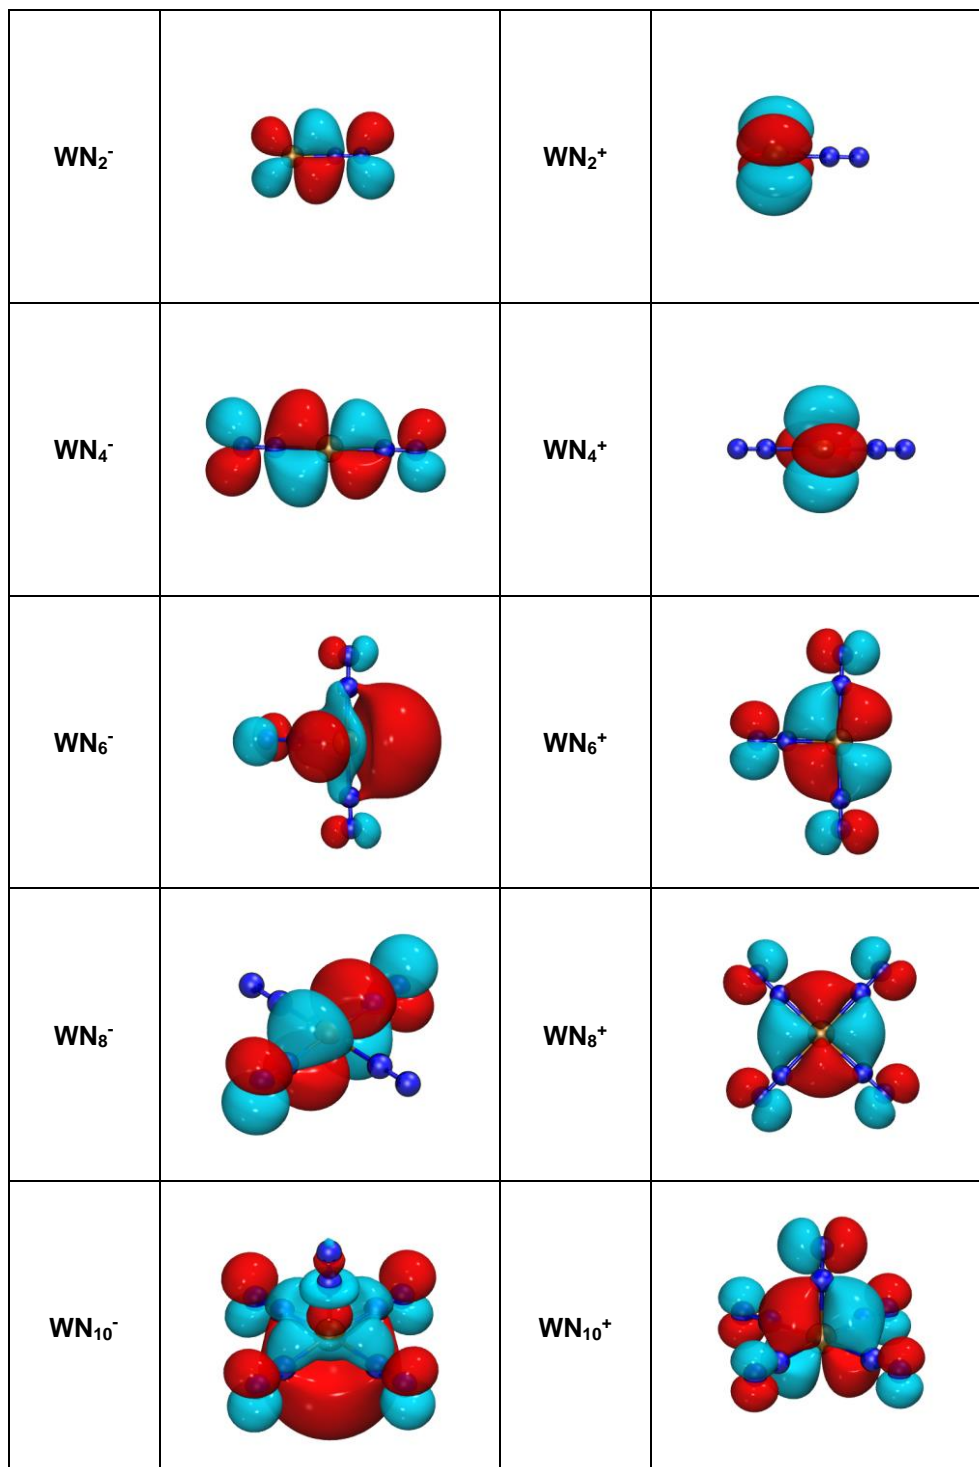

**Fig. S3** HOMOs of  $W(N_2)_n^{-/0}$  ( $n=1-5$ ) at the PBE0/ma-TZVP level. Isosurface value is 0.02.

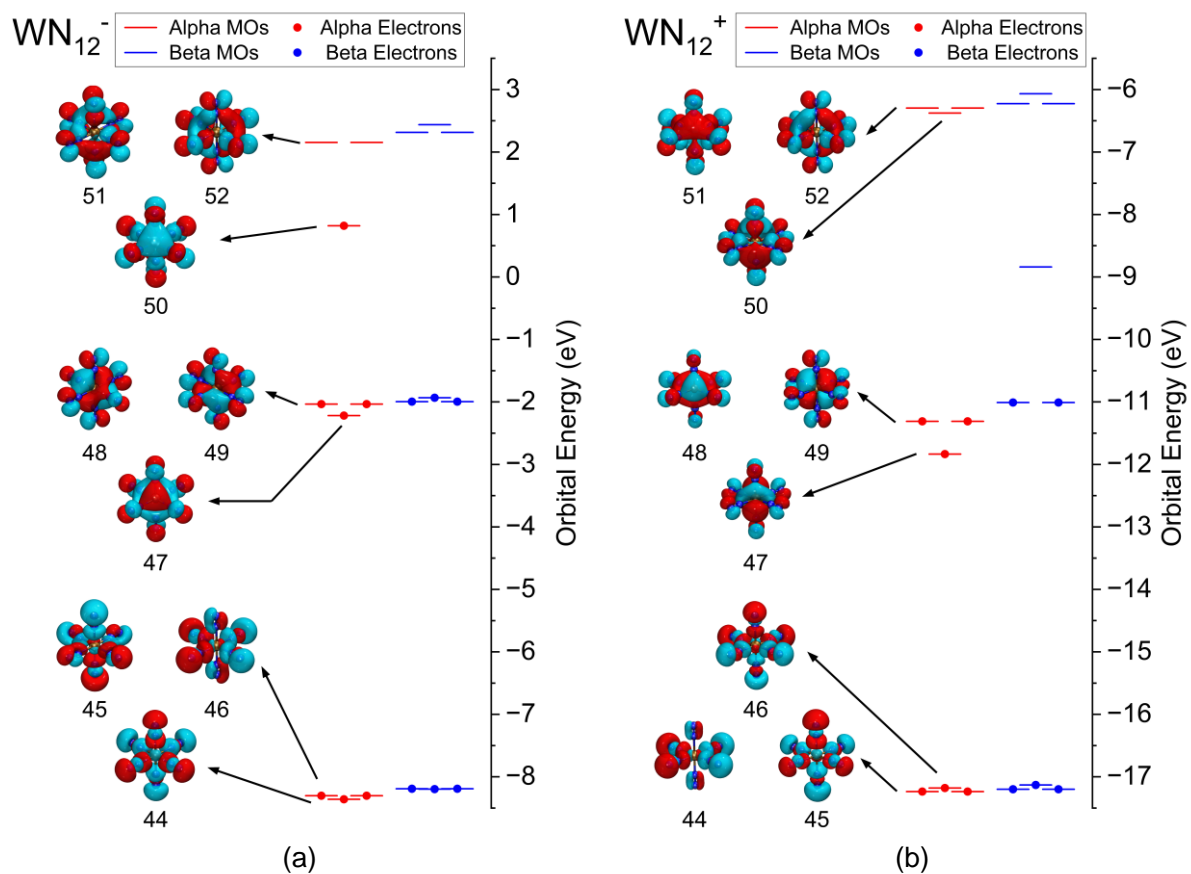

**Fig. S4** Energy levels and diagrams of the molecular orbitals of the  $\text{WN}_{12}^{-/+}$  at the PBE0/ma-TZVP level. Isosurface value is 0.02.

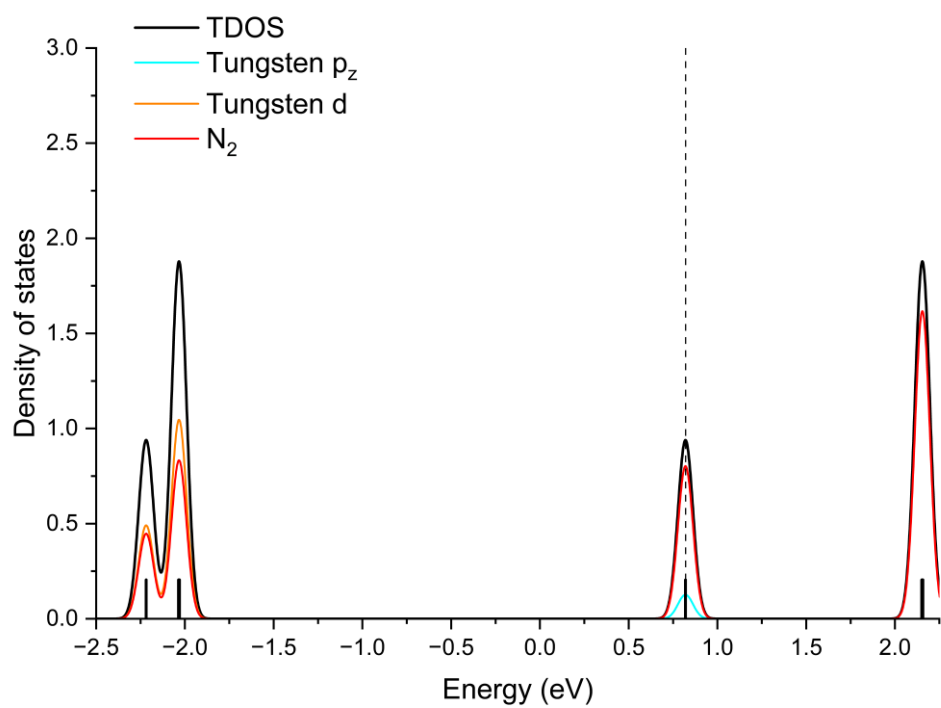

**Fig. S5** DOS map of the  $\text{WN}_{12}^-$ . The dashed line represents the location of the HOMO.

**Table S1** The experimental VDEs of  $\text{WN}_{10}^-$  compared with computational values using the TD-PBE0 method

|   | VDE (eV)<br>(Expt.) | VDE (eV)<br>(Comput.) <sup>a</sup> | Final<br>state | Final electronic<br>configuration <sup>c</sup>                    |
|---|---------------------|------------------------------------|----------------|-------------------------------------------------------------------|
|   | 1.582               | 1.507 <sup>b</sup>                 | $^1\text{A}_1$ | $2\text{B}_1^2 19\text{E}^2 20\text{E}^2 \mathbf{14\text{A}_1^0}$ |
|   |                     |                                    |                |                                                                   |
| A | 2.53                | 2.46                               | $^3\text{E}$   | $2\text{B}_1^2 \mathbf{19\text{E}^1} 20\text{E}^2 14\text{A}_1^1$ |
| B | 2.58                | 2.46                               | $^3\text{E}$   | $2\text{B}_1^2 19\text{E}^2 \mathbf{20\text{E}^1} 14\text{A}_1^1$ |
| C | 2.62                |                                    |                |                                                                   |
|   |                     |                                    |                |                                                                   |
| D | 2.75                | 2.88                               | $^3\text{B}_1$ | $\mathbf{2\text{B}_1^1} 19\text{E}^2 20\text{E}^2 14\text{A}_1^1$ |
| E | 2.80                |                                    |                |                                                                   |
| F | 2.83                |                                    |                |                                                                   |
|   |                     |                                    |                |                                                                   |
| G | 2.99                | 3.16                               | $^1\text{B}_1$ | $\mathbf{2\text{B}_1^1} 19\text{E}^2 20\text{E}^2 14\text{A}_1^1$ |
| H | 3.03                |                                    |                |                                                                   |
| I | 3.08                |                                    |                |                                                                   |
|   |                     |                                    |                |                                                                   |
| J | 3.13                | 3.21                               | $^1\text{E}$   | $2\text{B}_1^2 19\text{E}^2 \mathbf{20\text{E}^1} 14\text{A}_1^1$ |
| K | 3.17                | 3.21                               | $^1\text{E}$   | $2\text{B}_1^2 \mathbf{19\text{E}^1} 20\text{E}^2 14\text{A}_1^1$ |
| L | 3.22                |                                    |                |                                                                   |
| M | 3.25                |                                    |                |                                                                   |
| N | 3.28                |                                    |                |                                                                   |
| O | 3.33                |                                    |                |                                                                   |
| P | 3.38                |                                    |                |                                                                   |

<sup>a</sup> The excited states of the one-electron-detached species were obtained from TDDFT calculations of the neutrals.

<sup>b</sup> The first VDE was obtained by the CCSD(T) method.

<sup>c</sup> The orbitals labeled in bold are the major electron detachment channels.

**Table S2** T1 diagnostic factors of  $\text{WN}_{10}^{-/0}$  clusters

| Isomers | $\text{WN}_{10}^-$ |       |       |       | $\text{WN}_{10}^0$ |       |       |       |
|---------|--------------------|-------|-------|-------|--------------------|-------|-------|-------|
|         | 10A                | 10B   | 10C   | 10D   | 10a                | 10b   | 10c   | 10d   |
| T1      | 0.036              | 0.033 | 0.036 | 0.037 | 0.017              | 0.015 | 0.015 | 0.025 |



**Table S3** Cartesian atomic coordinates of the typical low-lying isomers of  $\text{WN}_{10}^-$  optimized with PBE0 functional

| <b>10A</b> |             |             |             | <b>10B</b> |             |             |             |
|------------|-------------|-------------|-------------|------------|-------------|-------------|-------------|
| W          | 0.00000000  | 0.00000000  | 0.17064900  | W          | -0.00189100 | -0.16403800 | 0.00000000  |
| N          | 0.00000000  | 2.00596300  | 0.31834800  | N          | -0.00003300 | -0.27835300 | 2.00269300  |
| N          | -2.00596300 | 0.00000000  | 0.31834800  | N          | -2.23246300 | -0.50339400 | 0.00000000  |
| N          | 0.00000000  | 0.00000000  | -1.78911700 | N          | -0.00003300 | -0.27835300 | -2.00269300 |
| N          | 2.00596300  | 0.00000000  | 0.31834800  | N          | -0.40742500 | 1.76833600  | 0.00000000  |
| N          | 0.00000000  | -2.00596300 | 0.31834800  | N          | 1.95642300  | 0.11719600  | 0.00000000  |
| N          | 0.00000000  | -3.12457300 | 0.40641700  | N          | 3.07035200  | 0.29469300  | 0.00000000  |
| N          | 0.00000000  | 3.12457300  | 0.40641700  | N          | -0.00003300 | -0.35424700 | 3.12128200  |
| N          | 0.00000000  | 0.00000000  | -2.91394400 | N          | -0.00003300 | -0.35424700 | -3.12128200 |
| N          | 3.12457300  | 0.00000000  | 0.40641700  | N          | -0.64206700 | 2.86394900  | 0.00000000  |
| N          | -3.12457300 | 0.00000000  | 0.40641700  | N          | -1.72470300 | -1.54146100 | 0.00000000  |
| <b>10C</b> |             |             |             | <b>10D</b> |             |             |             |
| W          | 0.00000000  | 0.00000000  | 0.10495500  | W          | 0.15851000  | 0.02995400  | 0.00000000  |
| N          | 0.00000000  | 1.97072100  | 0.53403200  | N          | 1.15983900  | 1.41827700  | 1.42974500  |
| N          | -1.99856400 | 0.00000000  | 0.09371600  | N          | 0.05596500  | 1.72317000  | 1.51172800  |
| N          | 0.00000000  | -1.97072100 | 0.53403200  | N          | 1.15983900  | 1.41827700  | -1.42974500 |
| N          | 0.00000000  | -0.57544800 | -2.04940900 | N          | 0.05596500  | 1.72317000  | -1.51172800 |
| 1.99856400 | 0.00000000  | 0.09371600  |             | N          | 0.16453700  | -1.34479000 | -1.40184000 |
| N          | 3.12069100  | 0.00000000  | 0.06297700  | N          | 0.16453700  | -2.12002500 | -2.22184200 |
| N          | 0.00000000  | 3.05889800  | 0.80392400  | N          | -1.82519200 | 0.13455400  | 0.00000000  |
| N          | 0.00000000  | -3.05889800 | 0.80392400  | N          | -2.94024000 | 0.19552500  | 0.00000000  |
| N          | 0.00000000  | 0.57544800  | -2.04940900 | N          | 0.16453700  | -1.34479000 | 1.40184000  |
| N          | -3.12069100 | 0.00000000  | 0.06297700  | N          | 0.16453700  | -2.12002500 | 2.22184200  |

**Table S4** Cartesian atomic coordinates of the typical low-lying isomers of WN<sub>10</sub> optimized with PBE0 functional

| <b>10a</b> |             |             |             | <b>10b</b> |             |             |             |
|------------|-------------|-------------|-------------|------------|-------------|-------------|-------------|
| W          | 0.00000000  | 0.00000000  | 0.21690700  | W          | 0.13636200  | -0.15983600 | 0.00000000  |
| N          | 0.00000000  | 2.02678600  | 0.26647000  | N          | 0.13705100  | -0.21243500 | 2.02278100  |
| N          | 2.02678600  | 0.00000000  | 0.26647000  | N          | -1.58584500 | -1.67736200 | 0.00000000  |
| N          | 0.00000000  | -2.02678600 | 0.26647000  | N          | 0.13705100  | -0.21243500 | -2.02278100 |
| N          | -2.02678600 | 0.00000000  | 0.26647000  | N          | -1.34293700 | 1.13926700  | 0.00000000  |
| N          | 0.00000000  | 0.00000000  | -1.73186800 | N          | 1.46395700  | 1.33315500  | 0.00000000  |
| N          | 0.00000000  | 0.00000000  | -2.84651700 | N          | 2.22476200  | 2.14528200  | 0.00000000  |
| N          | 0.00000000  | 3.13617400  | 0.30487200  | N          | 0.13705100  | -0.24913200 | 3.13224400  |
| N          | 0.00000000  | -3.13617400 | 0.30487200  | N          | 0.13705100  | -0.24913200 | -3.13224400 |
| N          | -3.13617400 | 0.00000000  | 0.30487200  | N          | -2.16299800 | 1.88818200  | 0.00000000  |
| N          | 3.13617400  | 0.00000000  | 0.30487200  | N          | -0.58668700 | -2.21569800 | 0.00000000  |
| <b>10c</b> |             |             |             | <b>10d</b> |             |             |             |
| W          | -0.06130300 | 0.18576300  | 0.00000000  | W          | 0.00000000  | 0.00000000  | 0.00000000  |
| N          | -0.06856200 | -0.11228900 | 3.14265900  | N          | 0.00000000  | 2.01650100  | 0.00000000  |
| N          | -0.06856200 | 0.02548700  | 2.04720400  | N          | 0.00000000  | 0.00000000  | 2.03259700  |
| N          | -0.06856200 | 0.02548700  | -2.04720400 | N          | -1.74634100 | -1.00825000 | 0.00000000  |
| N          | -0.06856200 | -0.11228900 | -3.14265900 | N          | 0.00000000  | 0.00000000  | -2.03259700 |
| N          | -0.00470800 | 2.26973100  | 0.57677500  | N          | 1.74634100  | -1.00825000 | 0.00000000  |
| N          | -0.00470800 | 2.26973100  | -0.57677500 | N          | 2.71252800  | -1.56607900 | 0.00000000  |
| N          | 1.52799300  | -0.96587400 | 0.00000000  | N          | 0.00000000  | 3.13215700  | 0.00000000  |
| N          | 2.46725000  | -1.56762800 | 0.00000000  | N          | -2.71252800 | -1.56607900 | 0.00000000  |
| N          | -1.18981900 | -1.45890000 | 0.00000000  | N          | 0.00000000  | 0.00000000  | -3.14072500 |
| N          | -1.87370400 | -2.33723600 | 0.00000000  | N          | 0.00000000  | 0.00000000  | 3.14072500  |
